# Supplementary material
Source: PubMed Central journal article supplement (PMC10544824)
Supplement: NIHMS1922485-supplement-1.pdf [file NIHMS1922485-supplement-1.pdf]

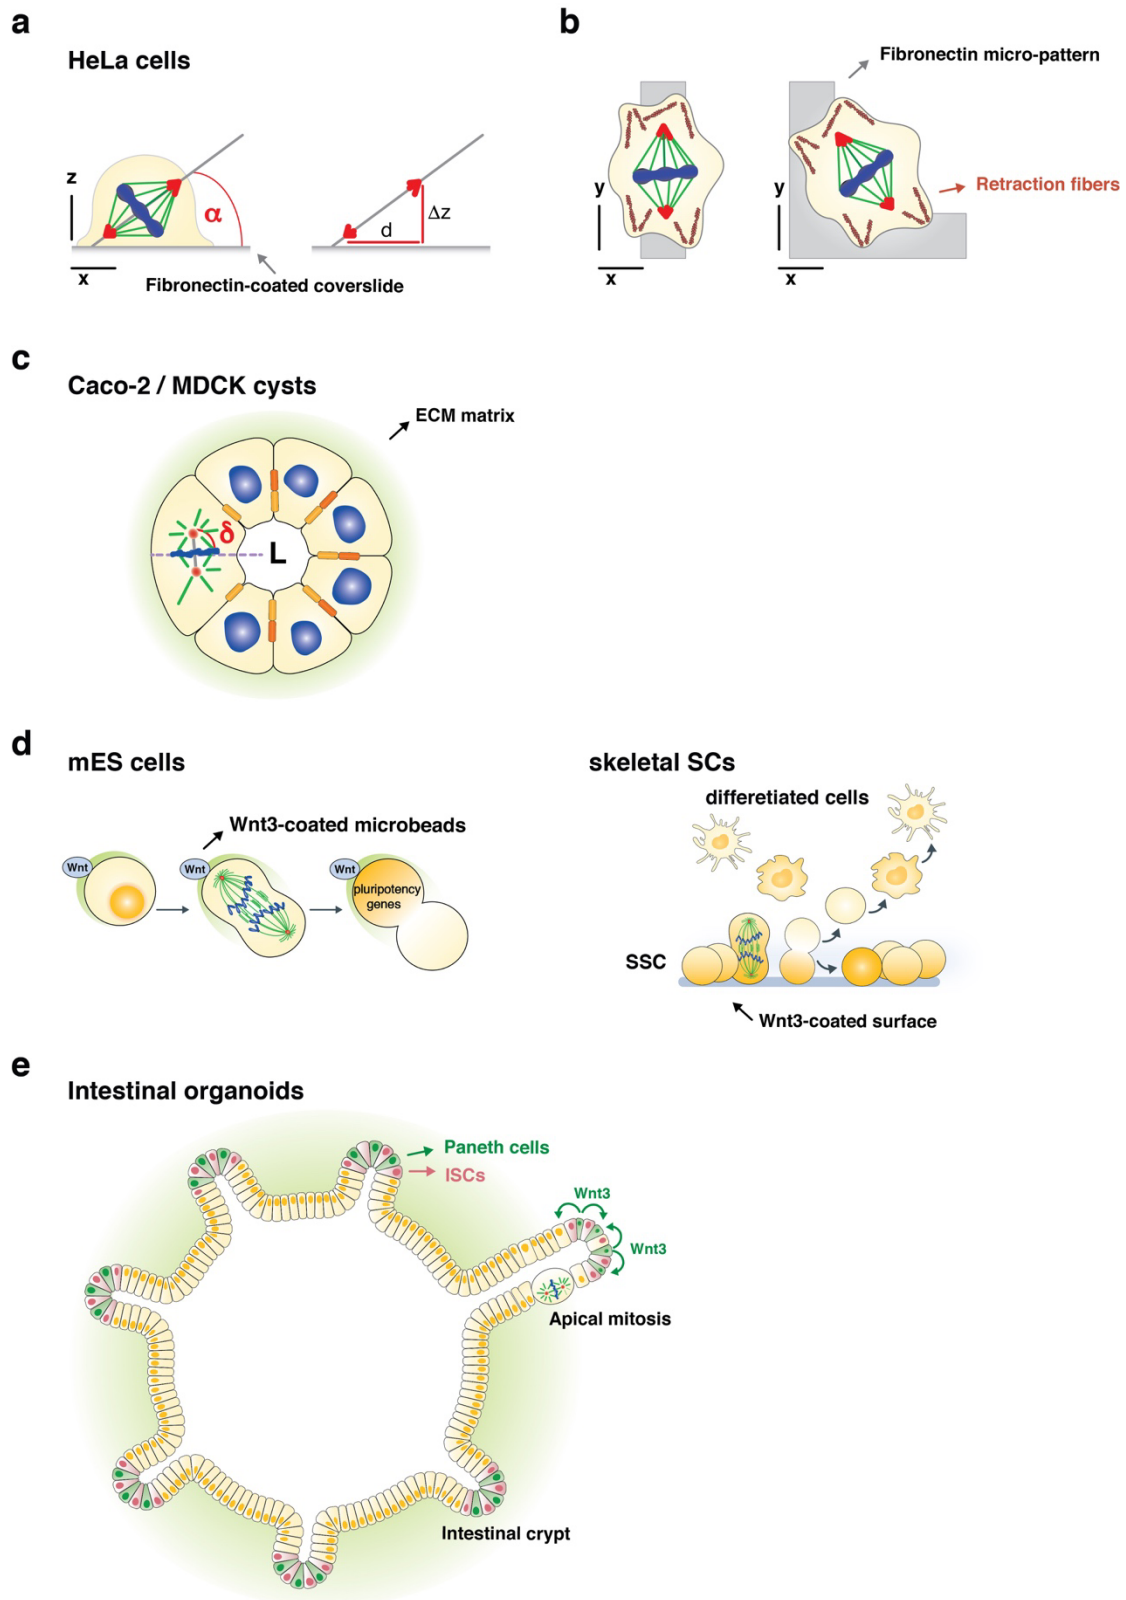

**Figure S1**

1050

1051 **Supplementary Box 1: Experimental assays employed to study spindle orientation**

1052 **mechanisms**

1053 Several imaging-based assays can be employed to study mechanisms of spindle  
1054 orientation *in vitro*, either in metaphase or in anaphase. It is important to stress here that  
1055 the molecular events underlying spindle orientation during mitotic progression are  
1056 substantially different, therefore it is important to measure the spindle axis angle in the  
1057 mitotic phase one wish to analyze, generally metaphase or anaphase. Here we survey  
1058 the most common ones.

1059 **1. Adherent cells on fibronectin-coated coverslips.** The easiest assay to assess  
1060 integrin-mediated division orientation of cultured epithelial cells is to plate them on  
1061 fibronectin-coated coverslips, and measure the angle between the mitotic spindle axis  
1062 and the substrate, which is around zero for wild-type cells<sup>1</sup> (see figure part **a**).  
1063 Technically this can be performed in a number of ways. The easiest approach is to  
1064 visualize by immunofluorescence or fluorescent probes the spindle poles (with  $\gamma$ -  
1065 tubulin for instance) and the chromosomes, and acquire a confocal x-z optical section  
1066 passing through the poles. The orientation angle in metaphase can be directly measured  
1067 as the angle between the spindle axis and the substratum (figure part **a**, left).  
1068 Alternatively, it is possible to acquire several confocal x-y stacks of fixed metaphase  
1069 cells, and calculate the spindle inclination using the formula  $\arctan(\Delta z/d)$ , with  $d$  being  
1070 the distance between centrosomes in the maximum intensity projection, and  $\Delta z$  being  
1071 the projection of the centrosome distance in the  $z$  axis (figure part **a**, right).  
1072 Measurements of the spindle alignment to the substratum in anaphase are conducted  
1073 similarly, oftentimes using the lines connecting separating sister chromatids rather than  
1074 centrosomes.

1075 **2. Division orientation on ECM pattern.** Pioneering studies in the Bornens and Thery  
1076 lab introduced the use of micro-contact printing to generate extra-cellular matrix  
1077 patterns of defined shapes that can be used to evaluate the retraction-fibers-mediated  
1078 spindle orientation in the x-y plane<sup>2,3</sup>. In the years, the most widely used patterns have

1079 been L-shaped and striped pattern (see figure part **b**). Notably, ECM pattern on  
1080 stretchable substrates have become instrumental to analyse orientation response to  
1081 tension at a single cell level or in monolayered epithelia<sup>4</sup>.

1082 **3. Three-dimensional cysts.** Molecular events coupling epithelial polarity to division  
1083 orientation have been investigated in 3D cysts of human intestinal Caco-2 cells and  
1084 canine kidney MDCK cells <sup>5</sup>. These cells, when plated in matrigel, undergo planar  
1085 divisions and grow in monolayered spheres with the apical side facing the lumen.  
1086 Defects in orientation mechanism results in multi-lumen cysts or disorganized cellular  
1087 spheres (see figure part **c**). Scoring of the multilumen cysts combined with imaging of  
1088 the spindle axis alignment to apico-basal polarity in cells provide information on  
1089 mechanisms of spindle coupling to epithelial polarity.

1090 **4. Wnt3-coated surfaces.** Filming mitoses of cells in contact with microbeads coated  
1091 with Wnt3-lipidated ligands is becoming a popular tool to analyse coupling of division  
1092 orientation to localized Wnt signals, mimicking niche microenvironment <sup>6</sup>. This  
1093 experimental setting was successfully used to monitor asymmetric division of murine  
1094 embryonic stem cells (see figure part **d**). An interesting variant developed by the Habib  
1095 lab are Wnt3a-coated platforms that can be employed to culture stem cells in matrigel to  
1096 follow differentiation programs <sup>7</sup>.

1097 **5. Organoids.** The implication and impact of division orientation in the morphogenesis  
1098 and homeostasis of epithelial tissues can be evaluated in organoid cultures,  
1099 recapitulating the complexity of tissue architecture and signalling. Intestinal organoids,  
1100 growing from doublet of intestinal stem cells and niche-acting Paneth cells, are ideal to  
1101 study spindle orientation mechanisms as they form monolayered crypts enriched in  
1102 proliferating cells, and undergo Wnt3-dependent oriented divisions promoting  
1103 migration along the crypt accompanied to differentiation <sup>8</sup> (see figure part **e**).  
1104 Interestingly, mini-guts grown from intestinal cells isolated from wild-type mice might

1105 also allow the study of reinsertion mechanisms known to correct some type of  
1106 misoriented divisions in living organisms<sup>9</sup>, which do not seem not be active in Caco-2  
1107 and MDCK cysts, to the best of our knowledge.
